# Detection of Envelope Glycoprotein Assembly from Old-World Hantaviruses in the Golgi Apparatus of Living Cells

Petazzi R. A.<sup>1</sup>, Koikkarah A. A.<sup>1</sup>, Tischler N.D.<sup>2,3</sup>, Chiantia S.<sup>1,\*</sup>

1. University of Potsdam, Institute of Biochemistry and Biology, Karl-Liebknecht-Str. 24-25, 14476 Potsdam, Germany

2. Fundación Ciencia & Vida, Laboratorio de Virología Molecular, Av. Zañartu 1482, Santiago, Chile

3. Universidad San Sebastián, Santiago, Chile

\* E-mail: [chiantia@uni-potsdam.de](mailto:chiantia@uni-potsdam.de)

**Keywords:** fluorescence fluctuation microscopy, number and brightness, virus assembly, fluorescence correlation spectroscopy, protein-protein interaction

## Abstract

Hantaviruses are emerging pathogens that occasionally cause deadly outbreaks in the human population. While the structure of the viral envelope has been characterized with high precision, the protein-protein interactions leading to the formation of new virions in infected cells are not fully understood yet. In this work, we use quantitative fluorescence microscopy (i.e. Number&Brightness analysis and fluorescence fluctuation spectroscopy) to quantify the interactions that lead to oligomeric spike complex formation in the physiological context of living cells. To this aim, we have analyzed proteins from Puumala and Hantaan orthohantaviruses in several cellular models. For the first time, we quantified the oligomerization state of each protein in relation to its subcellular localization, concentration and the concentration of its interaction partner. Our results indicate that when expressed separately, both glycoproteins can form homo-multimers in a concentration-dependent manner. Fluorescence fluctuation analysis was applied to prove that Gc:Gc contacts observed on virions are also relevant for Gc-Gc interactions in living cells, in the absence of Gn. Furthermore, we proved that the membrane-distal lobes of Gn are not necessary for Gn homo-multimerization. In cells co-expressing both glycoproteins, we observe clear indication of Gn-Gc interactions and the formation of protein complexes with different sizes, while using various labelling schemes to minimize the influence of the fluorescent tags. Our data are compatible with an assembly model according to which hantavirus spikes are formed via the assembly of Gn-Gc hetero-dimers. Furthermore, our results indicate the interconnection of large Gn-Gc hetero-multimers in the Golgi apparatus. Such large glycoprotein multimers may be identified as multiple interacting viral spikes and provide a possible first evidence for the initial assembly steps of the viral envelope, within this organelle, directly in living cells.

## 36 **Introduction**

37 Hantaviruses (HV) are single-stranded, negative sense RNA viruses belonging to the  
38 *Hantaviridae* family of the order Bunyvirales. While usually infecting rodents, insectivorous  
39 mammals or bats (1), these emerging pathogens can occasionally cause deadly outbreaks in the  
40 human population (2). Their segmented genome encodes at least a nucleocapsid protein, a  
41 RNA-dependent RNA polymerase and a glycoprotein precursor (GPC) (3). The assembly of  
42 HV particles in infected cells is a complex process that relies on the precise spatial and temporal  
43 organization of several viral proteins. The specific molecular mechanisms driving protein-  
44 protein interactions in this context are not fully characterized yet.

45 While negative-stranded RNA viruses typically assemble and bud at the plasma membrane (4,  
46 5), Bunyvirales are mostly characterized by intracellular maturation (6). In all HVs, two  
47 glycoproteins (GPs) form surface spikes and are derived from the GPC encoded in the M  
48 segment of the tripartite genome. After, The N-terminal Gn and C-terminal Gc have been  
49 suggested to be cleaved co-translational by cellular signal peptidases (7). The interplay between  
50 Gn and Gc has a fundamental importance in HV assembly and budding (8, 9).

51 Early studies that aimed to localize singularly expressed Gn and Gc showed variations for  
52 different members of the Bunyvirales order (10, 11). However, co-expression of both HV GPs  
53 results, in general, in their translocation to the Golgi apparatus (GA) (12-16). This holds true  
54 also for recombinant proteins that are not derived from a common precursor (17).

55 On the other hand, not much is known about where and how Gn-Gc hetero-complexes are  
56 initially assembled in an infected cell. It is therefore of great interest to address the role of  
57 protein-protein interactions involved in the maturation of the HV spike complex. Cryo-EM  
58 studies on the surface of Tula virus (TULV) indicated that such a complex is formed by square-  
59 shaped Gn-Gc hetero-octamers composed of four Gn and Gc molecules (18, 19). The presence  
60 of Gn-Gc heteromultimers has also been confirmed by biochemical assays of virion extracts  
61 (20). The fitting of the Gn ectodomain crystal structure of PUUV into the spike density of a  
62 cryo-EM tomography reconstruction of TULV revealed that Gn forms the membrane distal  
63 tetrameric lobes with Gc occupying the volume underneath (21). The design of cysteine  
64 mutations at the two-fold axis of a crystallographic Gc dimer (22) further proved that Gc:Gc  
65 contacts connect adjacent spikes and additional residue substitutions showed that the  
66 interactions at the inter-spike Gc:Gc interface are crucial for virus particle assembly (23).

67 A quantitative assessment of Gn-Gc interactions leading to the formation of spike complexes  
68 in a more physiological environment within a living cell is still lacking. According to the model

69 proposed by Hepojoki *et al.* (24), the assembly of HV spikes might follow two pathways. In  
70 one case (referred to as “assembly model 1” in what follows), homotypic interactions between  
71 Gn monomers lead first to the formation of a tetrameric core to which Gc proteins subsequently  
72 bind to form larger hetero-complexes. In the second case (i.e. “assembly model 2”), the  
73 formation of a Gn-Gc heterodimer is the first step in the formation of the final spike complex  
74 (via interactions between four Gn-Gc heterodimers).

75 While the above-mentioned biochemical and structural characterizations of virion surface  
76 provide information about completely formed spike complexes, alternative approaches are  
77 needed to clarify how protein-protein interactions occur in different intra-cellular  
78 compartments, leading to the spike and inter-spike assembly.

79 Here, we apply Number and Brightness (N&B) analysis to quantify the homo- and hetero-  
80 oligomerization of HV Gn and Gc, directly in living cells. Previously, we have used this method  
81 to demonstrate that Gn possesses a significantly higher tendency to oligomerize, compared to  
82 Gc. This approach was based on the bulk analysis of several cells, in a restricted protein  
83 concentration range, and required some assumptions on the actual presence of specific  
84 multimeric states (e.g. Gn tetramers) (16).

85 In this new work, we provide a complete quantitative characterization of HV GPs homo-  
86 multimerization, over a large concentration range, for two different virus strains and in different  
87 cell models. Also, we investigate the hetero-interactions between Gn and Gc using a novel  
88 quantitative fluorescence assay based on bidirectional expression vectors, allowing us to  
89 monitor the oligomerization of one protein as a function of the concentration of the other.  
90 Finally, we determine the most probable of the proposed assembly models and provide the first  
91 experimental evidence of HV assembly directly in the GA of living cells.

## 92 **Materials and Methods**

93

### 94 **Cloning and generation of chimeric proteins**

95 Unless otherwise specified, glycoprotein gene sequences refer to the PUUV strain. Original  
96 plasmids of signal peptide (SP)-mEYFP-Gn and SP-mEYFP-Gc were previously described  
97 (16). Plasmids encoding Gn and Gc preceded by three HA tags (HAtag-Gn, HAtag-Gc) were a  
98 gift from A. Herrmann (Humboldt Universität zu Berlin). A monomeric variant of EGFP,  
99 containing the A206K mutation (25), was PCR amplified from a mEGFP-C1 vector and cloned  
100 into these vectors to substitute mEYFP and generate SP-mEGFP-Gn and SP-mEGFP-Gc  
101 respectively. Vectors for the expression of N-terminally mEGFP-tagged Gn and Gc mutants  
102 were synthesized by Twist Bioscience (San Francisco, CA, USA): a Gn variant comprising of  
103 amino acids 387-658 and lacking part of the ectodomain ( $\Delta$ Gn) and Gc variants with point  
104 mutations at the Gc:Gc interface (H303C Gc, H303E Gc).  $\Delta$ Gn contains a flexible linker  
105 between mEGFP and the truncated Gn (EGKSSGSGSESKST) (26, 27). A plasmid for bi-  
106 directional expression was a gift from K. Arndt (Universität Potsdam). Promoters TTC31 and  
107 CCDC142 allowed simultaneous expression of encoded genes (28). mEGFP and mCherry2  
108 were PCR-amplified and cloned into the two expression cassettes flanked by restriction sites  
109 BamHI/EcoRI and SacI/KpnI respectively, to obtain mEGFP $\leftarrow\rightarrow$ mCherry2. A construct with  
110 mCherry2 and mEGFP cloned into SacI/KpnI and BamHI/EcoRI restriction sites, respectively,  
111 was also produced (mCherry2 $\leftarrow\rightarrow$ mEGFP). Unlabeled GP sequence (SP-Gn and SP-Gc) were  
112 PCR-amplified and separately cloned into the BamHI/EcoRI cassette to produce SP-  
113 Gn $\leftarrow\rightarrow$ mCherry2 and SP-Gc $\leftarrow\rightarrow$ mCherry2. A plasmid encoding the whole Hantaan virus  
114 (HTNV) GPC was a gift from Dr. S. Weiss (Charité, Berlin). The signal peptide was introduced  
115 at the N-terminus of mEGFP-C1 and Gn and Gc were independently amplified and cloned into  
116 this vector to obtain HTNV SP-mEGFP-Gn and SP-mEGFP-Gc. Golgi-mTurquoise was a gift  
117 from Dorus Gadella (Addgene plasmid # 36205) and has been described before (16). ER-  
118 mCherry, Golgi-mCherry and MyrPalm-mEGFP were previously described in (16). ER-  
119 mEGFP and Golgi-mEGFP were obtained by PCR amplification of mEGFP from mEGFP-C1  
120 and substitution of the FP via digestion/ligation at the restriction sites AgeI/BsrGI. FastDigest  
121 enzymes (Thermo Scientific, Waltham, MA, USA) were used for all restriction reactions.  
122 Ligations were performed with T4 DNA Ligase (Thermo Scientific) at 16° overnight. All  
123 cloning were tested by Sanger sequencing of expression plasmids.

124

## 125 **Cell culture and transfection**

126 Chinese hamster ovary cells (CHO-K1), adenocarcinomic human alveolar basal epithelial cells  
127 (A549), human embryo kidney cells (HEK-293T) and VeroE6 cells were maintained in  
128 Dulbecco's modified Eagle's medium containing 10% fetal bovine serum, 100 U/mL penicillin,  
129 0.1 mg/mL streptomycin and 4 mM L-Glutamine. Cells were passaged every 3–5 days, no more  
130 than 15 times. All solutions, buffers and media used for cell culture were purchased from PAN-  
131 Biotech (Aidenbach, Germany).  $3-6 \cdot 10^5$  cells were plated on glass-bottom 35-mm-diameter  
132 plates (CellVis, Mountain View, CA or MatTek Corp., Ashland, MA) 48 hours before  
133 experiments. Fusion protein expression plasmids were transfected into (70-90% confluent) cells  
134 using Turbofect™ (Thermo Scientific) according to the manufacturer's protocol, 20-24 hours  
135 prior to experiments. VeroE6 cells were transfected with Lipofectamine™ 3000 (Thermo  
136 Scientific) instead, since they are not susceptible to transfection by Turbofect™.

137

## 138 **Confocal fluorescence microscopy**

139 Confocal fluorescence images were obtained with a 40× water immersion objective (NA 1.2)  
140 at 21°C on a Zeiss LSM780 (Carl Zeiss, Oberkochen, Germany) confocal microscope with a  
141 frame size of 512 x 512 pixels. mTurquoise was excited at 405 nm using a laser diode and  
142 observed in 475–490 nm detection range. mEGFP was excited at 488 nm using a CW Argon  
143 laser (Lasos, Jena, Germany) and detected in the range of 498–606 nm. mCherry2 was excited  
144 at 561 nm using a laser diode and observed in 578-695 nm detection range. Images with more  
145 than one fluorescent species were recorded sequentially to minimize signal cross-talk.

146 For intracellular immunofluorescence staining, cells were washed three times with phosphate-  
147 buffered saline with calcium and magnesium (PBS, PAN-Biotech) and fixed with 3.7%  
148 paraformaldehyde (Sigma-Aldrich, Munich, Germany) for 25 min at room temperature.  
149 Afterwards, the cells were washed three times with PBS before permeabilization with 0.2%  
150 Triton X-100 (Sigma-Aldrich) and 0.2% bovine serum albumin (PAN-Biotech) for 20 min.  
151 After three more washing steps, cells were incubated with anti-HA tag rabbit primary antibody  
152 (Abcam, Berlin, Germany, ab13511) for 1 h. This procedure was repeated for the Alexa488-  
153 conjugated secondary antibody (goat anti rabbit IgG, Thermo Scientific) and the  
154 immunostaining was concluded with three washing steps.

155

## 156 **Fluorescence Correlation Spectroscopy**

157 Point FCS measurements (29) were performed for 120 s on a Zeiss LSM780 microscope and  
158 recorded using the Zen Black software. mCherry2 was excited at 561 nm using a laser diode  
159 and observed in 578-695 nm detection range. Laser powers were adjusted to keep  
160 photobleaching below 20%. Typical values were  $\sim 6 \mu\text{W}$  (561 nm). The size of the confocal  
161 pinhole was set to 1 airy unit. Intensity time series were analyzed with the Zen software to  
162 obtain the auto-correlation function (ACF):

$$163 \quad G(\tau) = \frac{\langle \delta F(t) \delta F(t + \tau) \rangle}{\langle F(t) \rangle^2}$$

164

165 where  $\delta F(t) = F(t) - \langle F(t) \rangle$ . The ACF was fitted as described in (30). The inverse of the  
166 amplitude  $G(0)$  indicates the number of particles in the effective confocal volume (29). To  
167 calibrate the confocal volume, pFCS measurements with Alexa Fluor® 488 or Rhodamine B  
168 dissolved in water at 50 nM were performed at the same laser power. The structure parameter  
169  $S$  (defined as the ratio between the vertical and lateral dimension of the theoretical confocal  
170 ellipsoid) was fixed to the value determined in the calibration measurement (typically around 4  
171 to 8).

172

## 173 **Number and Brightness**

174 Number and Brightness analysis (N&B) was performed as previously described (16, 31).  
175 Briefly,  $3\text{-}6 \cdot 10^5$  cells were plated onto 35 mm glass-bottom dishes (CellVis, Mountain View,  
176 CA or MatTek Corp., Ashland, MA) 48 h prior to the experiment and transfected as described  
177 above. Confocal images were acquired using a Zeiss LSM780 microscope. The 488 nm  
178 excitation from a CW Argon laser was focused with a 40 $\times$  UPLS Apochromat 1.2 NA water  
179 objective into the sample. The fluorescence signal was collected by a Zeiss QUASAR  
180 multichannel GaAsP detector in a 498-606 nm range in photon counting mode. The laser power  
181 was set so that the photon count rate and bleaching remained below 1 MHz and ca. 20%,  
182 respectively (i.e. typical laser power values were  $\leq 4 \mu\text{W}$ ). Images of  $128 \times 128$  pixels were  
183 acquired with pixel dimensions  $\sim 400$  nm and a pixel dwell time of 25-50  $\mu\text{s}$ . Image time-stacks  
184 of 105 scans were collected using the Zeiss Black ZEN software. The intensity time-stacks data  
185 were analyzed using a self-written Matlab code (The MathWorks, Natick, MA, USA). The  
186 Matlab algorithm implements the equations from Digman *et al.* (32) for the specific case of

187 photon-counting detectors, thus obtaining the molecular brightness and number as a function  
188 of pixel position. Regions of interest (e.g. ER, GA) were selected in cell images by applying a  
189 mask obtained from the intensity map of co-transfected ER-mCherry2 or Golgi-mCherry2.

190 To correct for photobleaching effects and minor cell movements, a boxcar-filter pixel-wise with  
191 8-frames length was used, as previously described (16, 33). Saturation of detectors leading to  
192 artefactual reduction in brightness was avoided by excluding pixels in which photon-counting  
193 rates exceeded  $\sim 1$  MHz. Using this selection criterion, saturation induced brightness decrease  
194 was kept below 10 %. To further correct the detector response, we took into account the signal  
195 originating from a thin film containing immobilized fluorophores (31).

196 Finally the brightness values obtained from every single measurement were normalized to  
197 account for the monomer brightness  $\varepsilon_m$  and the fluorescence probability ( $p_m$ ), which  
198 determines the detectability of the tag (30). Briefly, the absolute brightness  $\varepsilon_i$  was compared to  
199 the brightness of the monomer and corrected using previously determined values for  $p_m$ , thus  
200 obtaining an estimation of the multimerization state:

$$201 \quad \varepsilon_n = \frac{1}{p_m} \left( \frac{\varepsilon_i}{\varepsilon_m} - 1 \right) + 1.$$

202 HV GPs are mostly found in the ER and GA (13, 14, 16, 34). Therefore,  $\varepsilon_m$  was determined for  
203 standard fluorescent proteins localized in the same subcellular compartments: ER-mEGFP (to  
204 be compared to Gn) and Golgi-mEGFP (to be compared to Gc). The actual multimeric state of  
205 these specific reference constructs was never quantified before. For this reason, the  
206 corresponding monomeric molecular brightness reference values were obtained by subjecting  
207 the specimen to several bleaching cycles (10-20s at a laser power 5-10 times higher than the  
208 measuring parameters) followed by N&B data acquisition. Since completely bleached  
209 multimers do not contribute to the overall brightness value, the lowest constant brightness  
210 measurement obtained indicates indeed the monomer reference brightness value (Fig. S1). We  
211 found that ER-mEGFP and Golgi-mEGFP form multimers (containing ca. 3-6 units) and that  
212 the monomeric brightness reference value can be calculated in a reproducible manner after the  
213 step-wise bleaching procedure ( $\sim 1$  kHz/molecule). Furthermore, we observed that the monomer  
214 brightness values for the ER and GA markers were comparable to that of a membrane-  
215 associated monomeric fluorescent construct (i.e. MyrPalm-mEGFP) that is typically used in  
216 quantitative fluorescence microscopy experiments (16, 35). For this reason, we proceeded to  
217 use MyrPalm-mEGFP as reference for further measurements, thus avoiding the time-  
218 consuming step-wise bleaching calibration process.

219 The concentration  $N$  (in monomer units) was calculated by dividing the mean count rate in the  
220 ROI by the absolute brightness of the reference monomer:

$$221 \quad N = \frac{\langle F(t) \rangle}{\varepsilon_m}$$

222 This corresponds to the number of monomers observed in the confocal volume (see previous  
223 paragraph). This number was then converted in concentration (i.e. monomers/ $\mu\text{m}^3$ ) using a  
224 value of  $0.25 \mu\text{m}$  for the lateral size of the confocal volume. The structure parameter  $S$  of the  
225 confocal volume was the value determined in the calibration measurement, typically around 4  
226 to 8. When plotting brightness vs. concentration data, segmented averages were calculated by  
227 dividing the whole concentration range in bins of variable width (containing ca. 1-4 points) and  
228 calculating mean values therein. Bins contained in general fewer points for high concentration  
229 values, i.e. in regions where the density of data points was lower. Unless differently stated, an  
230 empiric model was fitted to the data:

231

$$232 \quad \varepsilon = 1 + \frac{a}{1 + e^{-k(\text{Concentration} - C_{1/2})}}$$

233 where  $\varepsilon$  is the normalized brightness and  $a$ ,  $k$  and  $C_{1/2}$  are fitting parameters.  $C_{1/2}$  in particular  
234 is an indicator of the concentration at which half of the total protein is monomeric, in the simple  
235 approximation that only two oligomeric species are present (e.g. a mixture of 10 tetramers and  
236 40 monomers).

237 Finally, in the case of mixtures of two different oligomeric states, the corresponding molar  
238 fractions  $n_1$  and  $n_2$  were determined by inverting the following equation:

$$239 \quad \varepsilon = \frac{\varepsilon_1^2 \cdot n_1 + \varepsilon_2^2 \cdot n_2}{\varepsilon_1 \cdot n_1 + \varepsilon_2 \cdot n_2}$$

240 where  $\varepsilon_i$  indicates the multimerization of the  $i$ -th species and  $\varepsilon$  is the observed normalized  
241 brightness.



## 242 **Results**

243

### 244 **Gn forms homo-tetramers in a concentration-dependent manner**

245 In order to dissect the process of spike formation from GP monomers, we independently  
246 quantified the concentration-dependent multimerization of either Gn or Gc, at different protein  
247 concentrations, directly in living cells (36, 37). While local protein concentration cannot be  
248 actively controlled, it is possible to collect data from several cells randomly expressing different  
249 protein amounts. In order to quantify Gn (or Gc) multimerization, we performed N&B analysis.  
250 N&B is a fluorescence fluctuation-based method that allows to calculate the concentration and  
251 the molecular brightness of diffusing fluorescent molecules (32). The latter parameter indicates  
252 the amount of fluorescence signal detected for a single independent fluorescent molecular  
253 complex (e.g. a single protein tetramer) in the unit of time. The molecular brightness increases  
254 therefore if several monomers diffuse together (i.e. as a single entity) through the observation  
255 volume. By normalizing the measured value by the molecular brightness of a monomeric  
256 reference, it is possible to calculate the amount of fluorophores in the complex and, thus, its  
257 multimerization state (16, 30).

258 We analyzed mEGFP-tagged fluorescent constructs derived from two HV strains GPs in  
259 different cell line models (i.e. CHO-K1, HEK-293T, A549 and Vero E6 cells). In particular,  
260 the alveolar epithelial cells A549 were selected since “New World” HV strains can cause  
261 respiratory diseases (Hantavirus Pulmonary syndrome, HPS). Vero E6 cells are often used for  
262 the propagation and isolation of HVs. N-terminal labelling with mEGFP was preferred to C-  
263 terminal labelling based on previous results indicating the importance of GP C-terminus in  
264 protein localization (16). ER and GA markers – mCherry fusion proteins (FPs) bound to the  
265 respective retention peptides – were used to identify regions of interest (ROIs) and restrict the  
266 N&B analysis to specific cellular compartments.

267 In the case of PUUV GPs, SP-mEGFP-Gn was retained in the ER, while SP-mEGFP-Gc  
268 significantly partitioned in the GA (Fig. 1 A and C), as expected from previous studies (16) and  
269 controls with unlabeled GPs (Fig. S2). According to N&B analysis (Fig. 1 B), SP-mEGFP-Gn  
270 consistently showed a concentration-dependent oligomerization behavior, ranging from  
271 monomers to tetramers. Of interest, the measured brightness did not significantly exceed the  
272 values expected for tetramers, even at the highest observable concentrations.

273

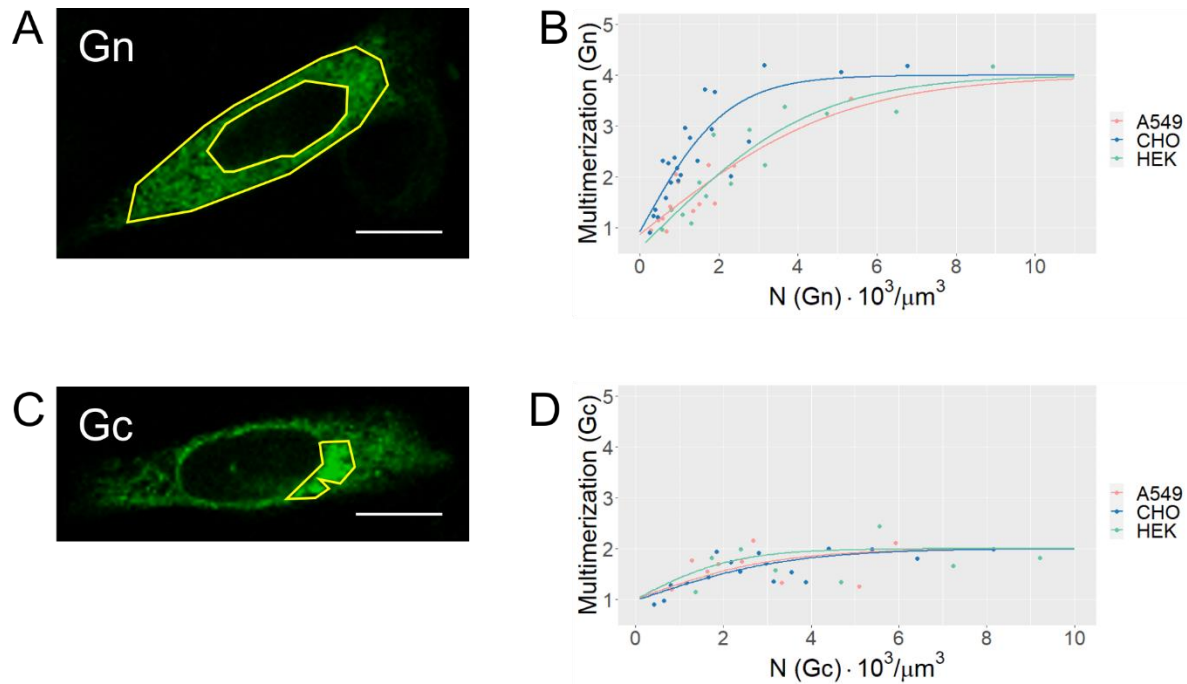

274

275 **Figure 1: Concentration-dependent multimerization of PUUV Gc and Gn.** Different cell lines expressed either  
276 SP-mEGFP-Gn (A, B) or SP-mEGFP-Gc (C, D). A, C) Representative fluorescence intensity maps of mEGFP-  
277 tagged GPs in CHO cells. Intensity maps of single cells were obtained as an average of 105 frames (128 × 128  
278 pixels) collected over ~2–3 min with a pixel dwell time of 25–50 μs. Examples or ROIs used for multimerization  
279 analysis are shown in yellow. White bars are 5 μm. B,D) Protein multimerization as a function of total protein  
280 concentration (in monomer units). N&B analysis was applied to a ROI in each cell (ER for Gn, Golgi for Gc)  
281 identified by an ER-mCherry or Golgi-mCherry marker. Multimerization values were obtained from molecular  
282 brightness normalization, as described in the Materials and Methods section. Each point is calculated from the  
283 average brightness extracted from ROIs in 2–4 cells with similar protein concentrations. Solid lines are a fit of an  
284 empirical model (see Materials and Methods) and are meant as guide to the eye. Each dataset is obtained from at  
285 least 5 independent experiments, for a total of approx. 50–70 examined cells.

286

287 The  $C_{1/2}$  concentration values (defined as the concentration at which half of the total protein is  
288 monomeric, in the simple approximation that only monomers and tetramers are present) range  
289 between  $\sim 1 \cdot 10^3$  (CHO) and  $\sim 3 \cdot 10^3$  (A549, HEK) monomers/μm<sup>3</sup>, for different cell lines.

290 On the other hand, SP-mEGFP-Gc multimerization only slightly correlates with its  
291 concentration in the GA (Fig. 1 D) or in the ER (Fig. S3). More in detail, SP-mEGFP-Gc  
292 oligomerization values ranged between those of monomers and dimers and did not exceed the  
293 value expected for dimers, even at the highest observable concentrations.

294 Analogous measurements were performed additionally in Vero E6 cells: although the  
295 expression of SP-mEGFP-Gn never reached concentrations high enough to observe a strong  
296 difference with SP-mEGFP-Gc or the clear formation of tetramers (Fig. S4, possibly due to  
297 sub-optimal transfection efficiency), GP multimerization might be compatible with that  
298 observed in other cell lines, at least at those low protein concentrations.

299 In order to assess whether HV GPs multimerization varies among different strains, Hantaan  
300 virus (HTNV) SP-mEGFP-Gn and SP-mEGFP-Gc were observed in CHO-K1 cells. Differently  
301 from PUUV GPs, both separately expressed proteins localize preferentially in the ER (Fig. 2 A  
302 and B). The quantification of the multimerization state via N&B analysis shown in Fig. 2 C  
303 indicates that SP-mEGFP-Gn forms monomers at low concentrations and tetramers at higher  
304 concentrations, similar to PUUV proteins. Also HTNV SP-mEGFP-Gc behaves similarly to its  
305 PUUV counterpart, displaying a multimerization state between monomers and dimers, over the  
306 explored concentration range.

307

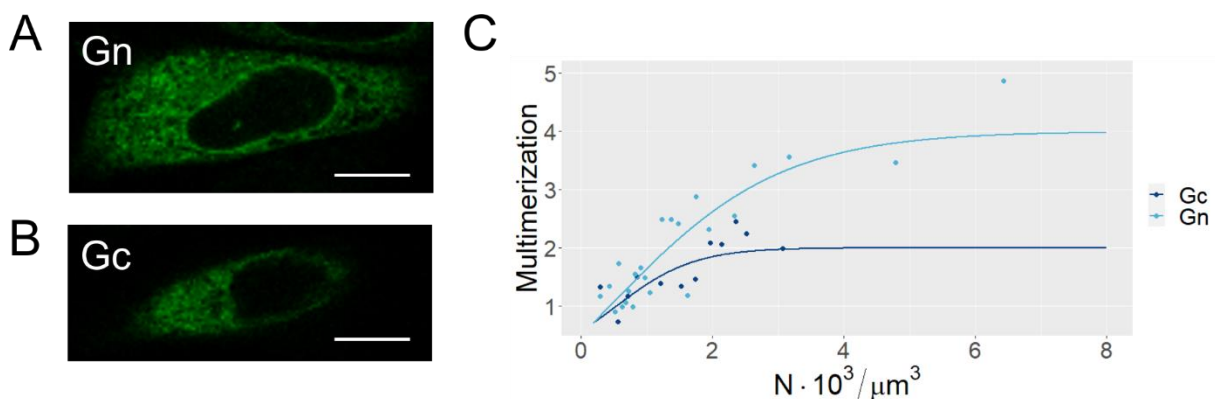

308

309 **Figure 2: Concentration-dependent oligomerization of HTNV Gc and Gn.** CHO-K1 cells were transfected  
310 with HTNV SP-mEGFP-Gn and SP-mEGFP-Gc vectors, respectively. A, B) Representative fluorescence intensity  
311 maps of mEGFP-tagged GPs in CHO cells. Intensity maps of single cells were obtained as an average of 100  
312 frames (128 × 128 pixels) collected over ~2–3 min with a pixel dwell time of 25–50 μs. White bars are 5 μm. C)  
313 Protein multimerization as a function of total protein concentration (in monomer units). N&B analysis was applied  
314 to a ROI in each cell identified by an ER-mCherry marker. Multimerization values were obtained from molecular  
315 brightness normalization, as described in the Materials and Methods section. Each point is calculated from the  
316 average brightness extracted from ROIs in 2–4 cells with similar protein concentrations. Solid lines are a fit to an  
317 empirical model (see Materials and Methods) and are meant as guide to the eye. Each dataset is obtained from at  
318 least 5 independent experiments, for a total of ca. 40–60 examined cells.

319

320 Altogether, these results indicate that, irrespective of specific cell line model or HV strain  
321 investigated, Gn can form oligomers (up to tetramers) when singularly expressed in cells. Gc,  
322 on the other hand, is found in monomeric and dimeric states at all investigated concentration  
323 levels.

324

325

326

327 **Gc:Gc interactions observed on the viral surface occur in cells also in the absence of Gn-**  
328 **Gc complexes**

329 The Gc:Gc inter-spike contact region has been previously investigated by structure-guided  
330 biochemical assays of Andes HV-like particles to determine which residues are involved in  
331 stabilizing the interaction (23). In particular, cysteine substitutions of selected residues at the  
332 Gc:Gc interface showed a higher stability of Gn-Gc hetero-multimers. The introduction of  
333 repulsive interactions by residues with the same charge at the Gc:Gc interface, instead, led to a  
334 decrease in protein-protein interactions. Since the Gc:Gc interface region is highly conserved  
335 among different HV strains (23), we analyzed the same mutants (i.e., H303C and H303E) for  
336 the mEGFP-tagged PUUV Gc construct. The aim of this experiment was to verify whether  
337 Gc:Gc contacts relevant for inter-spike interactions play also a role in determining interactions  
338 between Gc monomers in living cells.

339 Expression in of Gc mutants in CHO-K1 cells indicated that both constructs are homogeneously  
340 distributed in the ER (Fig. 3, A and B) but were expressed with significantly different  
341 efficiencies (data not shown). We then selected a shared concentration range (i.e.  $1-5 \cdot 10^3$   
342 monomers /  $\mu\text{m}^3$ ) for the three Gc constructs – wild type and the two mutants – and compared  
343 protein multimerization for these samples. Fig. 3 C shows that, compared to wt Gc, the H303E  
344 mutant displays a significantly lower multimerization. In the approximation that only Gc  
345 monomeric and dimeric assemblies are present (as suggested by the results reported in the  
346 previous paragraph), the observed average multimerization values correspond to a mixture of  
347 ca. 4:1 monomers:dimers for this mutant (cfr. approx. 3:2 monomers:dimers for the wt). On the  
348 other hand, H303C Gc mutants appear to be present almost exclusively in dimeric form, as  
349 expected from previous *in vitro* investigations of virus-like particles (23).

350

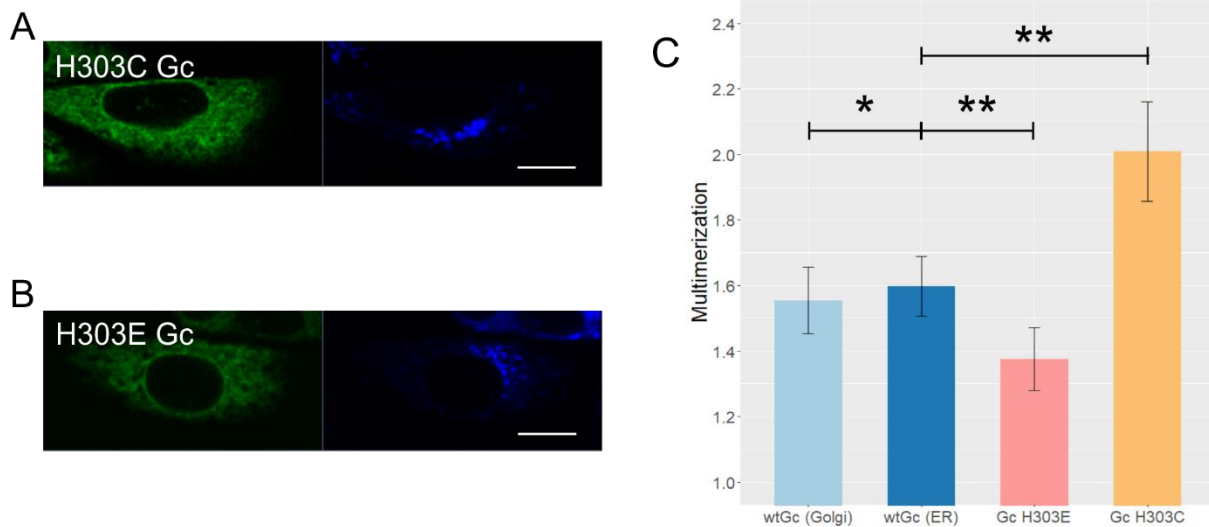

351

352 **Figure 3 Brightness analysis of PUUV Gc mutants.** CHO-K1 cells were transfected with SP-mEGFP-  
353 Gc(H303C), SP-mEGFP-Gc(H303E) or SP-mEGFP-Gc (wt) vectors. A, B) Representative fluorescence intensity  
354 images of PUUV Gc mutants H303C and H303E (left panels, in green) and Golgi-mTurquoise marker (right  
355 panels, in blue) co-expressed in CHO-K1 cells. Intensity images were obtained as an average of 105 frames (128  
356  $\times$  128 pixels) collected over  $\sim$ 2–3 min with a pixel dwell time of 25-50  $\mu$ s. White bars are 5  $\mu$ m. C) Normalized  
357 multimerization values calculated via N&B analysis. In order to compare all the different constructs displaying  
358 varying expression efficiencies, multimerization values were selected in the shared range of 1-5  $\cdot$  10<sup>3</sup> monomers /  
359  $\mu$ m<sup>3</sup>. Bars indicate the median of at least 3 separate experiments and ca. 30 cells, error bars are calculated as the  
360 standard error of the mean. T-test significance is represented by asterisks: p > 0.5 (\*), p < 0.05 (\*\*).

361

362 These results indicate that Gc:Gc dimerization in our cellular model occurs through the same  
363 contacts, as on the viral surface between spikes. Also, N&B analysis can be successfully applied  
364 to detect subtle changes in Gc-Gc interactions (e.g. induced by point mutations) and such  
365 interactions do not appear to be significantly hindered by the presence of a fluorescent tag.

366

### 367 **The membrane-distal lobes of PUUV Gn are not necessary for tetramer formation**

368 Based on the structural characterization of HV spikes, the central stalk of the Gn ectodomain  
369 (aa 388 to 484), Gn transmembrane region and endodomain may be responsible for homo-  
370 oligomerization (15, 21). Based on this criteria, we designed a Gn mutant lacking the membrane  
371 distal lobes of the ectodomain (21), thus obtaining SP-mEGFP-linker-Gn(387-658) ( $\Delta$ Gn).  
372 Protein localization was not influenced by the lack of the Gn lobes and the protein was still  
373 retained in the ER, similarly to wt SP-mEGFP-Gn (data not shown). As shown in Fig. 4,  
374 quantification of protein multimerization via N&B analysis indicates that  $\Delta$ Gn forms tetramers  
375 at high concentrations. The C<sub>1/2</sub> value (ca. 5000 monomers /  $\mu$ m<sup>3</sup>) is significantly higher than  
376 the one observed for wt SP-mEGFP-Gn (ca. 1500 monomers /  $\mu$ m<sup>3</sup>, see Fig. 1 B and 4),

377 implicating that tetramerization is favored in the case of the wt protein, although the Gn lobes  
378 are not strictly required.

379

380

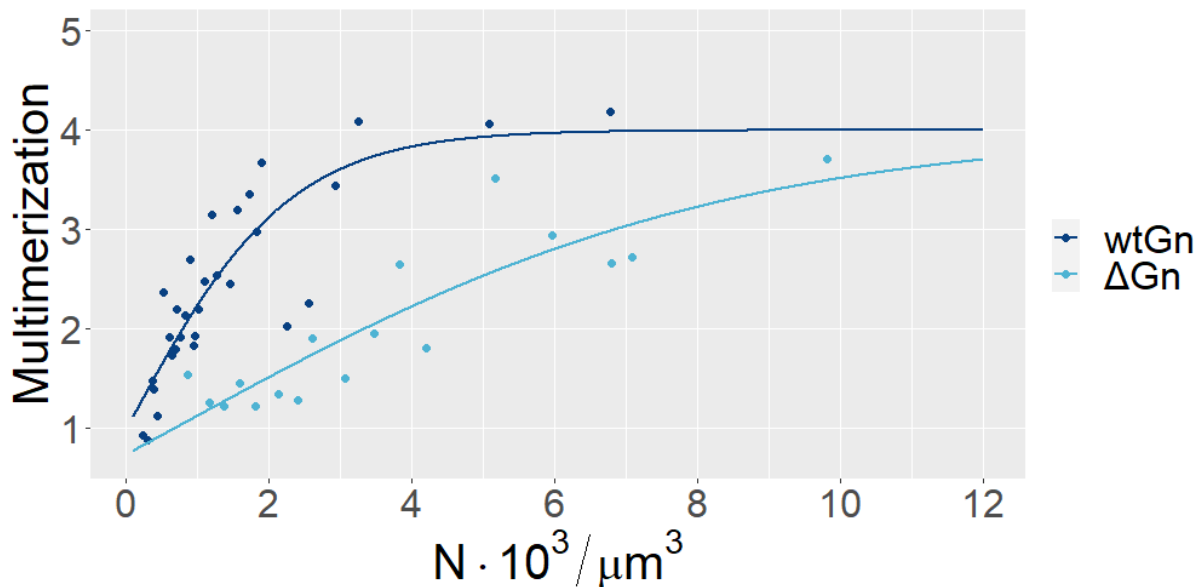

381

382 **Figure 4: Comparative brightness analysis of PUUV Gn wt and ΔGn.** CHO-K1 cells expressing ΔGn were  
383 analyzed. The mutant comprises amino acids 387-635 and is lacking part of the ectodomain. The graph shows  
384 protein multimerization as a function of total protein concentration (in monomer units), obtained via N&B analysis  
385 as described in the Materials and Methods section. The results for SP-mEGFP-Gn (wtGn) are shown as  
386 comparison. Each point is calculated from the average brightness extracted from ROIs in 2-4 cells with similar  
387 protein concentrations. Solid lines are a fit to an empirical model (see Materials and Methods) and are meant as  
388 guide to the eye. Each dataset is obtained from at least 5 independent experiments, for a total of ca. 50 examined  
389 cells.

390

391 **PUUV Gn forms high-order oligomers in the Golgi apparatus in the presence of Gc:**  
392 **1) using fluorescent and untagged Gc constructs**

393 We proceeded to study the interaction between Gn and Gc by co-expressing the two GPs in  
394 CHO-K1 cells and measuring their multimerization state via N&B analysis (Fig. 5). Co-  
395 expression of SP-mEGFP-Gn and SP-mCherry2-Gc caused an enrichment of both proteins to  
396 the GA, as previously observed (see Fig. S5 and (16)). The fluorescence signal (i.e. the protein  
397 concentration) in the ER was too low to obtain reproducible brightness values and, therefore,  
398 we quantified the multimerization of SP-mEGFP-Gn in the GA. Interestingly, Gn does not  
399 appear to form tetrameric assemblies (cfr. the case of SP-mEGFP-Gn in the absence of Gc, Fig.  
400 1), even at relatively high concentrations (Fig. 5 E). This might be caused by the steric hindrance  
401 of FPs fused to the N-terminal of both GPs. In order to minimize this effect, we analyzed Gn

402 multimerization also in cells co-expressing SP-mEGFP-Gn and unlabeled SP-Gc. While Gc is  
403 not detectable via fluorescence microscopy, we inferred its presence by the localization pattern  
404 of SP-mEGFP-Gn and limited the analysis to those cells with a clear partitioning of Gn in the  
405 GA. In these cases, SP-mEGFP-Gn was consistently found in higher-order multimers, up to  
406 octamers in average (Fig. S6).

407

408 **PUUV Gn forms high-order oligomers in the Golgi apparatus in the presence of Gc:**  
409 **2) using bi-directional GP constructs**

410 Transfecting cells with SP-mEGFP-Gn and an unlabeled SP-Gc construct allows an  
411 approximate characterization of Gn-Gc interactions. Although we focused on Gn localization  
412 in the GA as clue of the presence of Gc, this approach does not allow to confirm that both  
413 fluorescent Gn and unlabeled Gc are indeed present in every examined cell. We therefore  
414 adopted a novel alternative strategy that, additionally to solving the above-mentioned problem,  
415 allowed us to estimate the amount of unlabeled Gc. We transfected CHO-K1 cells with a vector  
416 for the expression of SP-mEGFP-Gn and, separately, a bi-directional vector for the concurrent  
417 expression of SP-Gc and cytosolic mCherry2 (indicated as SP-Gc $\leftrightarrow$ mCherry2) (Fig. 5A-D).  
418 The measured concentration of mCherry2 can be then used to estimate the amount of unlabeled  
419 SP-Gc in the GA (Fig. S7). The concentration of SP-mEGFP-Gn outside the GA was too low  
420 to detect significant and reproducible protein multimerization. On the other hand, the  
421 quantification of SP-mEGFP-Gn oligomeric state as function of its concentration in the GA  
422 confirmed our initial estimations, showing higher average oligomerization states ranging up to  
423 roughly dodecamers (Fig. 5 E), far above the typical values observed for of SP-mEGFP-Gn in  
424 the absence of Gc. Of note, since the multimerization values do not reach a constant value at  
425 high concentrations, it must be assumed that of SP-mEGFP-Gn is, in general, present as a  
426 mixture of different multimeric species. In this case, N&B analysis provides simply a weighted  
427 average value for the multimerization state. Finally, we observed that SP-mEGFP-Gn  
428 multimerization state has only a weak correlation to the concentration of unlabeled SP-Gc (Fig.  
429 S8).

430

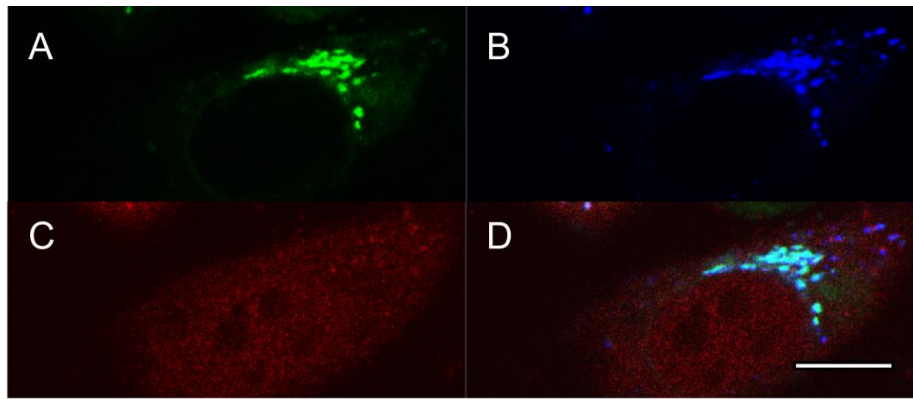

E

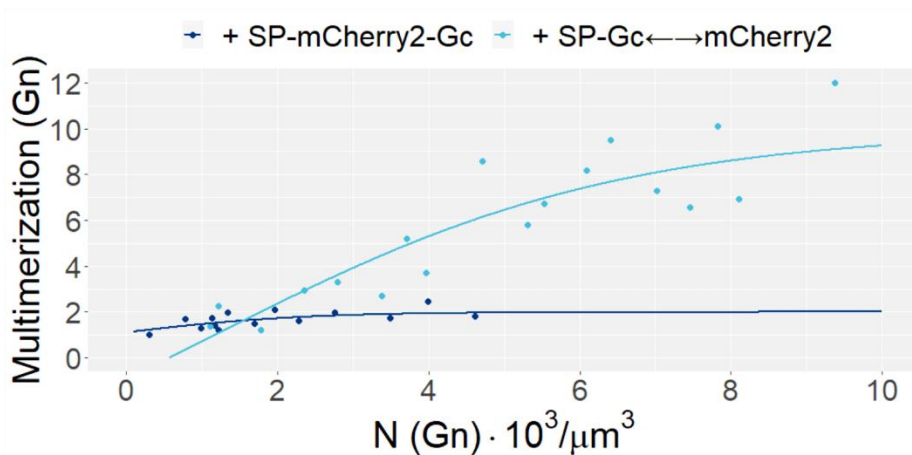

431

432

433 **Figure 5: Concentration-dependent oligomerization of PUUV Gn in the presence of Gc.** CHO-K1 cells  
434 expressed SP-mEGFP-Gn and either SP-mCherry2-Gc or SP-Gc (together with cytosolic mCherry2 within a bi-  
435 directional vector; indicated as SP-Gc←→mCherry2). A-D) Representative confocal microscopy image of CHO-  
436 K1 transfected with SP-mEGFP-Gn and SP-Gc←→mCherry2] vectors. Split view of SP-mEGFP-Gn (A), mGolgi-  
437 Turq marker (B), cytosolic mCherry2 (C) and merged channels (D). White bars are 5 μm. E) SP-mEGFP-Gn  
438 multimerization as a function of its total concentration (in monomer units), obtained via N&B analysis as described  
439 in the Materials and Methods section. The analysis was restricted to cells which showed significant expression of  
440 mCherry2. Each point is calculated from the average brightness extracted from ROIs in 2-3 cells with similar  
441 protein concentrations. Solid lines are a fit to an empirical model (see Materials and Methods) and are meant as  
442 guide to the eye. Each dataset is obtained from at least 4 separate experiments, for a total of ca. 40 cells.

443

#### 444 **PUUV Gc increases its multimerization in the GA in the presence of Gn**

445 We proceeded to investigate the multimerization behavior of SP-mEGFP-Gc in the presence of  
446 SP-Gn←→mCherry2 (i.e. a non-labelled SP-Gn construct concurrently expressed with  
447 cytosolic mCherry2). While the intra-cellular localization of SP-mEGFP-Gc in the GA is not  
448 altered by the presence of the other GP (Fig. 6 A-D), its molecular brightness is significantly  
449 higher than that measured in the absence of Gn, with values ranging between two and four (Fig.



450 6 E). The apparent multimerization behavior of SP-mEGFP-Gc seems to be only weakly  
451 correlated to either its concentration (Fig. 6 E) or to SP-Gn concentration (Fig. S9).

452

453

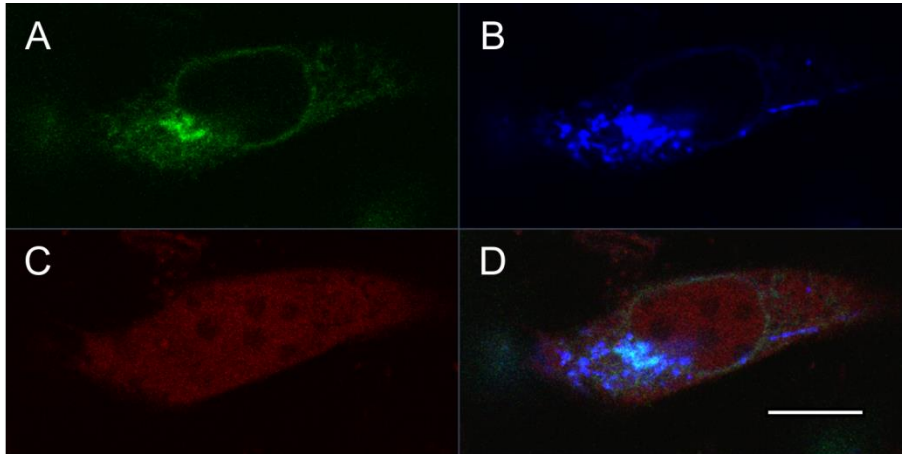

**F**

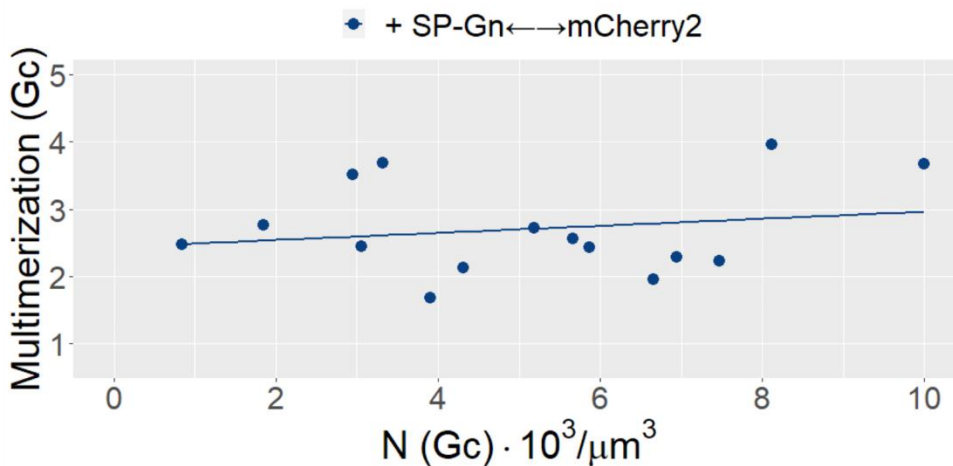

454

455

456 **Figure 6: Concentration-dependent oligomerization of PUUV Gc in the presence of Gn.** CHO-K1 cells  
457 expressed SP-mEGFP-Gc and SP-Gn (together with cytosolic mCherry2 within a bi-directional vector; indicated  
458 as SP-Gn $\leftrightarrow$ mCherry2). A-D) Representative confocal microscopy image of CHO-K1 transfected with SP-  
459 mEGFP-Gc and SP-Gn $\leftrightarrow$ mCherry2 vectors. Split view of SP-mEGFP-Gc (A), Golgi-mTurquoise marker (B),  
460 cytosolic mCherry2 (C) and merged channels (D). White bars are 5  $\mu$ m. B) SP-mEGFP-Gc multimerization as a  
461 function of total Gc concentration (in monomer units), obtained via N&B analysis as described in the Materials  
462 and Methods section. The analysis was restricted to cells which showed significant expression of mCherry2. Each  
463 point is calculated from the average brightness extracted from ROIs in 2-3 cells with similar protein concentrations.  
464 Solid lines are a fit to an empirical model (see Materials and Methods) and are meant as guide to the eye. Each  
465 dataset is obtained from at least 4 separate experiments, for a total of ca. 35 cells.

466

467

468

469

## 470 **Discussion**

471 The formation of homo- and hetero-complexes between Gn and Gc proteins is supposed to drive  
472 the assembly of new virions in infected cells. In spite of the importance of these inter-molecular  
473 interactions, there is a general lack of information regarding the oligomeric state of HV GPs  
474 directly during the process of virus assembly. In this study, we addressed this question and  
475 quantified the interactions that lead to oligomeric spike complex formation in the physiological  
476 context of living cells.

### 477 **Limited Gn and Gc homotypic-interactions**

478 In the case of Gc singularly expressed in different cell lines, the protein was found in monomeric  
479 and dimeric form both in the ER and GA (Fig. 1 D, 3 C, S3, S4). On the other hand, Gn  
480 oligomers ranged in size between monomers and tetramers, with a considerable correlation to  
481 the local protein concentration in the ER (Fig. 1 B). These results validate the hypothesis that  
482 HV spike formation is modulated by local protein concentration (8). Also, the formation of Gn  
483 tetramers and dimeric Gc:Gc contacts is in agreement with the proposed arrangement of GPs  
484 on the surface of PUUV and TULV particles, consisting of Gn-Gc hetero-octamers (i.e. four  
485 Gn and four Gc) interconnected via a small Gc:Gc interaction patch (18, 20, 38). By using  
486 mutations that stabilize (H303C) or destabilize (H303E) the Gc:Gc contact region between  
487 spikes on viral particles (23), we observed by N&B that the Gc-Gc interactions that occur in  
488 the GA of living cells are directed by the same contact interface in absence of Gn. The H303C  
489 Gc substitution induced dimers very efficiently while, conversely, the H303E substitution  
490 hindered dimer formation (Fig. 3). We were thus able to discern subtle changes in the apparent  
491 monomer-dimer equilibrium directly in living cells and validated previous results that identified  
492 specific amino acids at the Gc:Gc inter-spike contact interface as sensitive mediators of this  
493 interaction. The Gc:Gc contact surface might be too small to allow the formation of stable Gc  
494 dimers in solution, according to the observation that soluble Gc ectodomain remains monomeric  
495 in solution (22, 39). However, our results suggest that the confinement of Gc in a two-  
496 dimensional geometry within lipid membranes in the GA (and the consequent high local protein  
497 concentration) are sufficient to allow Gc:Gc association in living cells. These interactions might  
498 be further favored by inter-spike restrains during viral assembly and on the viral surface.

499 Similarly, we also analyzed regions in Gn which are responsible for its quaternary structure.  
500 We tested the concentration-dependent multimerization of the mutant  $\Delta$ Gn in which the N-  
501 terminal, membrane distal lobes of Gn (21) were deleted (while maintaining the Gn central  
502 stalk, transmembrane domain and endodomain). The fact that this Gn mutant also showed

503 increasing multimerization from monomers to tetramers – correlating to the local protein  
504 concentration (Fig. 4) – suggests that the membrane-distal lobe of Gn is not needed for Gn  
505 multimerization. The ca. 4-fold higher concentrations that were required for a significant  
506 multimerization to occur indicate that the membrane-distal lobe might contribute to the tetramer  
507 stabilization. The lower stability of  $\Delta$ Gn tetramers might also be partially caused by the N-  
508 terminal fusion FPs which, despite the 14 amino acid long linker region, may produce partial  
509 hindrance at the tetrameric center of the ectodomain, making multimerization less efficient. We  
510 previously observed an analogous behavior also for the Influenza A GP hemagglutinin, whose  
511 TMD can multimerize although only to a limited extent, compared to the wild-type (30).

### 512 **Multimerization-concentration curves**

513 In previous investigations from our laboratory, we have discussed the possibility of Gn  
514 tetramerization in cell models exclusively expressing this viral GP (16). Nevertheless, in that  
515 case, only average multimerization values could be obtained and the presence of tetramers had  
516 to be assumed *a priori* in order to estimate the amounts of the different oligomeric species. In  
517 this extended investigation instead, we have explored a wide range of concentrations and  
518 quantified GP multimerization with single-cell resolution. Further, the observation that the  
519 apparent multimeric state of Gn saturates at a value of  $\sim 4$  (Fig. 1 B) proves that Gn tetramers  
520 are indeed present (being the predominant multimeric species at concentrations higher than ca.  
521 2000 proteins / $\mu\text{m}^3$ ) and the amount of larger complexes is negligible at all concentrations. A  
522 similar conclusion can be drawn about Gc multimerization approaching asymptotically a value  
523 of  $\sim 2$ , indicating the presence of a monomer-dimer equilibrium, without the need for *a priori*  
524 assumptions deriving from biochemical/structural data.

### 525 **GP multimerization is consistent for different viral strains and cellular environments**

526 Comparison of different HV strains suggests only minor differences in behavior between PUUV  
527 and HTNV GPs expressed in CHO-K1 cells (Fig. 2). This is in agreement with the previous  
528 observation that, despite the genetic and geographical distinction between strains, the molecular  
529 structure of HV GPs are highly conserved (21, 22, 38-40). More in detail, while Gn localizes in  
530 the ER for both strains, Gc showed a partial enrichment in the GA for PUUV but not for HTNV,  
531 in agreement with a previous report (14). In this context, it is worth noting that former  
532 investigations provided conflicting results regarding the intracellular localization of singularly  
533 expressed Gn and Gc (12-14). Here, we report a consistent multimerization behavior for both  
534 Gn and Gc, when expressed alone, not correlating with their intracellular localization or cell

535 type. For example, we observed that Gc is found in monomeric or dimeric form, independently  
536 from viral strain and localization in GA/ER (Fig. 2, S3).

### 537 **Gn-Gc large scale hetero-interactions in the GA**

538 While the investigation of singularly expressed GPs can already provide information about the  
539 formation of homotypic complexes, it must be noted that HV assembly in physiological  
540 conditions occurs exclusively in the presence of both Gn and Gc. The last part of our study  
541 deals therefore with the quantification of protein-protein interactions occurring in the presence  
542 of both GPs. In detail, it was shown for HTNV (13, 14), PUUV (16), ANDV and SNV (15, 17)  
543 that Gn and Gc expressed together (from a single GPC, separate cDNAs or in the context of  
544 infection) co-localize in the GA. However, in this study, we quantify for the first time the  
545 oligomerization states of each protein in connection to its subcellular localization, its  
546 concentration and the concentration of its interaction partner. First, we confirmed that both  
547 PUUV Gn and Gc tagged with FPs are enriched in the GA. In this case, though, Gn does not  
548 form large oligomers and shows even decreased multimerization extent than when expressed  
549 alone (Fig. 5 E). We believe that the decreased oligomerization capabilities of Gn in this case  
550 are probably due to the steric hindrance generated by the fluorescent tag present on Gc N-  
551 terminus, since SP-mEGFP-Gn alone can readily form tetramers. This result, while originating  
552 from a drawback commonly encountered in fluorescence microscopy investigations, has some  
553 general implications. First, this is a strong indication of a direct Gn-Gc interaction, since a part  
554 of the Gc fluorescent construct appears to interfere with Gn-Gn contacts. Second, the formation  
555 of even relatively small Gn-Gc hetero-oligomers (Gn remaining monomeric or dimeric in  
556 average) seems sufficient for Gn transport to the GA. Third, it demonstrates that Gn-Gc  
557 interactions do not require the previous formation of Gn homo-tetramers (in disagreement with  
558 assembly model 1 proposed by Hepojoki et al. (24)).

559 The possibility that Gn-Gc multimerization is hindered when both GPs contain a fluorescent  
560 label is confirmed by the observation that, in the presence of unlabeled Gc, Gn forms multimers  
561 with up to eight subunits in average. We therefore developed a novel quantitative fluorescence  
562 approach to monitor the interactions between a fluorescent protein and an unlabeled protein,  
563 while also being able to estimate the concentrations of both interacting partners (see Figs. 5 E  
564 and 6). Using this approach, we observed that, in the presence of non-fluorescent Gc, Gn forms  
565 large oligomers, containing up to 8-12 subunits. It must be noted that, in contrast to the case of  
566 singularly expressed Gn, we did not observe saturation of Gn multimerization even for the  
567 highest concentrations considered. This suggests that even larger Gn multimers might be

568 present in this samples and the observed multimerization is in fact an average estimate. Also,  
569 the weak correlation between Gn multimerization and Gc concentration (Fig. S8) indicates that  
570 the formation of larger Gn complexes does not require preformed Gc:Gc dimeric association  
571 (that occurs at high Gc concentrations, see Fig. 1 D). Instead, the results support the idea that  
572 Gn and Gc may associate already at low concentrations, subsequently allowing the formation  
573 of higher order Gn-Gc species.

574 For the case of Gc in the presence of (non-fluorescent) Gn, instead, the apparent  
575 multimerization ranges between two and four, in average (i.e. oligomers with more than four  
576 units might also be present, albeit in small amounts). Since only Gc dimers are observed at best  
577 in the absence of Gn, multimers containing more than two Gc units must be mediated by Gn  
578 oligomers. The same holds true for Gn tetramers as largest Gn oligomer in the absence of Gc  
579 (i.e. four Gn units). The observation of Gc complexes with approximately four units diffusing  
580 as a whole might be explained by several Gn-Gc configurations, such as those shown in Fig. 7  
581 A-D.

582

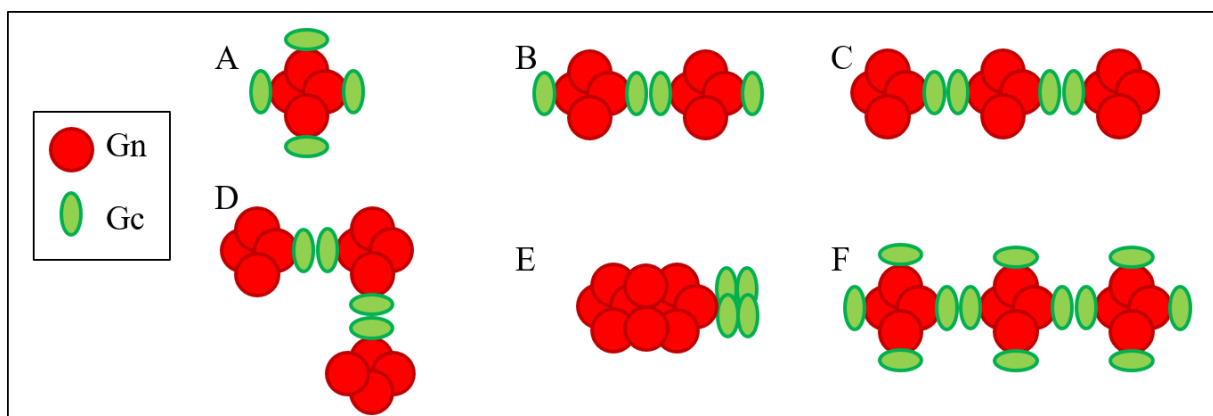

584 **Figure 7: Examples of Gn-Gc hetero-multimers compatible and incompatible with the highest observed**  
585 **multimerization states in cells expressing both Gn and Gc.** A-D) Examples of hetero-multimers containing 4  
586 Gc units and 4-12 Gn units. E) Gn-Gc arrangement containing a Gn homo-decamer linked to a Gc tetramer. Such  
587 hetero-multimer is compatible with the results shown in Figs. 5 and 6, but not with the GP quaternary structure  
588 observed for Gn (or Gc) in the absence of the other GP (Fig. 1). F) Gn-Gc hetero-octamers connected via Gc:Gc  
589 contacts described for the surface of viral particles (21, 23).

590

591 Larger Gn-Gc hetero-multimers, such as those described in Fig. 7 B-D, are additionally in line  
592 with the observation of high multimeric states for Gn mentioned before. Also, alternative spatial  
593 arrangements of Gn-Gc hetero-multimers (see e.g. the large Gn homo-multimer linked to a Gc

594 homo-tetramers in Fig. 7 E) would not be compatible with the largest Gn (or Gc) homo-  
595 oligomers observed in the absence of the other GP, i.e. tetramers (or dimers).

596 Clearly, we cannot exclude that the limited degree of Gc oligomerization (i.e. the limited  
597 amount of Gc monomers participating in the described possible Gn-Gc hetero-multimers) might  
598 be partially due to the presence of the N-terminal fluorescent tags. Our experiments cannot rule  
599 out the possibility that, in the absence of FPs, more Gc monomers might be present in Gn-Gc  
600 hetero-multimers (see e.g. Fig. 7 F). It is important to stress therefore that the FPs might have  
601 prevented a Gn-Gc stoichiometry of 1:1 that is otherwise guaranteed in natural infections.  
602 Nevertheless, it must be noted these results validate in general the proposed GP organization  
603 on the viral surface as Gn tetramers connected via Gc:Gc contacts (21, 23, 24). Finally, the lack  
604 of correlation between Gc multimerization and Gn concentration suggests once more that the  
605 assembly model 1 (24) cannot be entirely accurate, since that would require the formation of  
606 Gn multimers (i.e. higher Gn concentrations) for Gc multimerization to occur.

## 607 **Conclusions**

608 We have investigated the multimerization of HV envelope protein Gn and Gc from “old-world”  
609 HV, both singularly or expressed together in living cells, using quantitative fluorescence  
610 microscopy approaches. Based on our findings, we can validate a spike assembly model (based  
611 on the assembly model 2 proposed by Hepojoki et al. (24)) according to which Gn-Gc small  
612 hetero-oligomers (formed e.g. by a Gn dimer and a Gc monomer or, simply, a Gn-Gc hetero-  
613 dimer) are first formed in the ER allowing translocation of this complex to the GA. There, Gn-  
614 Gn interactions drive the formation of the hetero-octameric complex and Gc stabilizes contacts  
615 between neighboring spikes. The further assembly into still larger complexes is reasonably  
616 hindered by the presence of FPs in this case. While the presented method appears thus  
617 inherently limited by the influence of the fluorescent labels, it is worth stressing that we provide  
618 here, for the first time, direct evidence for the initial steps of HV assembly in the GA of living  
619 cells. The non-disruptive method presented in this work opens therefore the possibility for  
620 further investigations in the context of HV assembly, including for example the characterization  
621 of the interaction between GPs and the ribonucleocapsid protein (RNP) or other viral  
622 components.

623

624

625

626 **Acknowledgements**

627 This work was supported by the German Research Foundation (DFG grant 407961559 to S.C.)  
628 and ANID (Chile) grants FONDECYT 1181799 and Programa de Apoyo a Centros con  
629 Financiamiento Basal 170004 to N.D.T. The authors thank V. Dunsing for useful discussion.

630

631 **Contributions**

632 Research planning, N.D.T. and S.C.; investigation, R.A.P. and A.A.K.; data analysis, R.A.P.  
633 and A.A.K.; writing–original draft preparation, R.A.P. and S.C.; writing–review and editing,  
634 A.A.K. and N.T.; software, R.A.P.; supervision, S.C.; funding acquisition, N.D.T. and S.C.

## 635 **References**

- 636 1. **Ermonval M, Baychelier F, Tordo N.** 2016. What Do We Know about How  
637 Hantaviruses Interact with Their Different Hosts? *Viruses* **8**.
- 638 2. **Hjelle B, Torres-Perez F.** 2010. Hantaviruses in the americas and their role as  
639 emerging pathogens. *Viruses* **2**:2559-2586.
- 640 3. **Schmaljohn C, Hjelle B.** 1997. Hantaviruses: a global disease problem. *Emerg Infect*  
641 *Dis* **3**:95-104.
- 642 4. **Garoff H, Hewson R, Opstelten DJ.** 1998. Virus maturation by budding. *Microbiol*  
643 *Mol Biol Rev* **62**:1171-1190.
- 644 5. **Lyles DS.** 2013. Assembly and budding of negative-strand RNA viruses. *Adv Virus*  
645 *Res* **85**:57-90.
- 646 6. **Pettersson RF, Melin L.** 1996. Synthesis, assembly, and intracellular transport of  
647 Bunyaviridae membrane proteins, p 159-188, *The Viruses, The Bunyaviridae*.  
648 Springer, Boston, MA.
- 649 7. **Lober C, Anheier B, Lindow S, Klenk HD, Feldmann H.** 2001. The Hantaan virus  
650 glycoprotein precursor is cleaved at the conserved pentapeptide WAASA. *Virology*  
651 **289**:224-229.
- 652 8. **Cifuentes-Munoz N, Salazar-Quiroz N, Tischler ND.** 2014. Hantavirus Gn and Gc  
653 envelope glycoproteins: key structural units for virus cell entry and virus assembly.  
654 *Viruses* **6**:1801-1822.
- 655 9. **Hepojoki J, Strandin T, Lankinen H, Vaheri A.** 2012. Hantavirus structure--  
656 molecular interactions behind the scene. *J Gen Virol* **93**:1631-1644.
- 657 10. **Matsuoka Y, Chen SY, Holland CE, Compans RW.** 1996. Molecular determinants  
658 of Golgi retention in the Punta Toro virus G1 protein. *Arch Biochem Biophys*  
659 **336**:184-189.
- 660 11. **Andersson AM, Melin L, Persson R, Raschperger E, Wikstrom L, Pettersson RF.**  
661 1997. Processing and membrane topology of the spike proteins G1 and G2 of  
662 Uukuniemi virus. *J Virol* **71**:218-225.
- 663 12. **Pensiero MN, Hay J.** 1992. The Hantaan virus M-segment glycoproteins G1 and G2  
664 can be expressed independently. *J Virol* **66**:1907-1914.
- 665 13. **Ruusala A, Persson R, Schmaljohn CS, Pettersson RF.** 1992. Coexpression of the  
666 membrane glycoproteins G1 and G2 of Hantaan virus is required for targeting to the  
667 Golgi complex. *Virology* **186**:53-64.



- 668 14. **Shi X, Elliott RM.** 2002. Golgi localization of Hantaan virus glycoproteins requires  
669 coexpression of G1 and G2. *Virology* **300**:31-38.
- 670 15. **Spiropoulou CF, Goldsmith CS, Shoemaker TR, Peters CJ, Compans RW.** 2003.  
671 Sin Nombre virus glycoprotein trafficking. *Virology* **308**:48-63.
- 672 16. **Sperber HS, Welke RW, Petazzi RA, Bergmann R, Schade M, Shai Y, Chiantia  
673 S, Herrmann A, Schwarzer R.** 2019. Self-association and subcellular localization of  
674 Puumala hantavirus envelope proteins. *Sci Rep* **9**:707.
- 675 17. **Deyde VM, Rizvanov AA, Chase J, Otteson EW, St Jeor SC.** 2005. Interactions  
676 and trafficking of Andes and Sin Nombre Hantavirus glycoproteins G1 and G2.  
677 *Virology* **331**:307-315.
- 678 18. **Huiskonen JT, Hepojoki J, Laurinmaki P, Vaheri A, Lankinen H, Butcher SJ,  
679 Grunewald K.** 2010. Electron cryotomography of Tula hantavirus suggests a unique  
680 assembly paradigm for enveloped viruses. *J Virol* **84**:4889-4897.
- 681 19. **Battisti AJ, Chu YK, Chipman PR, Kaufmann B, Jonsson CB, Rossmann MG.**  
682 2011. Structural studies of Hantaan virus. *J Virol* **85**:835-841.
- 683 20. **Hepojoki J, Strandin T, Vaheri A, Lankinen H.** 2010. Interactions and  
684 oligomerization of hantavirus glycoproteins. *J Virol* **84**:227-242.
- 685 21. **Li S, Rissanen I, Zeltina A, Hepojoki J, Raghwani J, Harlos K, Pybus OG,  
686 Huiskonen JT, Bowden TA.** 2016. A Molecular-Level Account of the Antigenic  
687 Hantaviral Surface. *Cell Rep* **16**:278.
- 688 22. **Guardado-Calvo P, Bignon EA, Stettner E, Jeffers SA, Perez-Vargas J, Pehau-  
689 Arnaudet G, Tortorici MA, Jestin JL, England P, Tischler ND, Rey FA.** 2016.  
690 Mechanistic Insight into Bunyavirus-Induced Membrane Fusion from Structure-  
691 Function Analyses of the Hantavirus Envelope Glycoprotein Gc. *PLoS Pathog*  
692 **12**:e1005813.
- 693 23. **Bignon EA, Albornoz A, Guardado-Calvo P, Rey FA, Tischler ND.** 2019.  
694 Molecular organization and dynamics of the fusion protein Gc at the hantavirus  
695 surface. *Elife* **8**.
- 696 24. **Hepojoki J, Strandin T, Wang H, Vapalahti O, Vaheri A, Lankinen H.** 2010.  
697 Cytoplasmic tails of hantavirus glycoproteins interact with the nucleocapsid protein. *J  
698 Gen Virol* **91**:2341-2350.
- 699 25. **Zacharias DA, Violin JD, Newton AC, Tsien RY.** 2002. Partitioning of lipid-  
700 modified monomeric GFPs into membrane microdomains of live cells. *Science*  
701 **296**:913-916.

- 702 26. **Chen X, Zaro JL, Shen WC.** 2013. Fusion protein linkers: property, design and  
703 functionality. *Adv Drug Deliv Rev* **65**:1357-1369.
- 704 27. **Bird RE, Hardman KD, Jacobson JW, Johnson S, Kaufman BM, Lee SM, Lee T,**  
705 **Pope SH, Riordan GS, Whitlow M.** 1988. Single-chain antigen-binding proteins.  
706 *Science* **242**:423-426.
- 707 28. **Orekhova AS, Sverdlova PS, Spirin PV, Leonova OG, Popenko VI, Prasolov VS,**  
708 **Rubtsov PM.** 2011. [Novel bidirectional promoter from human genome]. *Mol Biol*  
709 (Mosk) **45**:486-495.
- 710 29. **Chiantia S, Ries J, Schwille P.** 2009. Fluorescence correlation spectroscopy in  
711 membrane structure elucidation. *Biochim Biophys Acta* **1788**:225-233.
- 712 30. **Dunsing V, Luckner M, Zuhlke B, Petazzi RA, Herrmann A, Chiantia S.** 2018.  
713 Optimal fluorescent protein tags for quantifying protein oligomerization in living cells.  
714 *Sci Rep* **8**:10634.
- 715 31. **Dunsing V, Chiantia S.** 2018. A Fluorescence Fluctuation Spectroscopy Assay of  
716 Protein-Protein Interactions at Cell-Cell Contacts. *J Vis Exp* doi:10.3791/58582.
- 717 32. **Digman MA, Dalal R, Horwitz AF, Gratton E.** 2008. Mapping the number of  
718 molecules and brightness in the laser scanning microscope. *Biophys J* **94**:2320-2332.
- 719 33. **Dunsing V, Mayer M, Liebsch F, Multhaup G, Chiantia S.** 2017. Direct evidence  
720 of amyloid precursor-like protein 1 trans interactions in cell-cell adhesion platforms  
721 investigated via fluorescence fluctuation spectroscopy. *Mol Biol Cell* **28**:3609-3620.
- 722 34. **Spiropoulou CF.** 2013. Hantavirus maturation, p 33-44, *Hantaviruses*. Springer  
723 Science & Business Media.
- 724 35. **Bobone S, Hilsch M, Storm J, Dunsing V, Herrmann A, Chiantia S.** 2017.  
725 Phosphatidylserine Lateral Organization Influences the Interaction of Influenza Virus  
726 Matrix Protein 1 with Lipid Membranes. *J Virol* **91**.
- 727 36. **Chen Y, Johnson J, Macdonald P, Wu B, Mueller JD.** 2010. Observing protein  
728 interactions and their stoichiometry in living cells by brightness analysis of  
729 fluorescence fluctuation experiments. *Methods Enzymol* **472**:345-363.
- 730 37. **Macdonald P, Johnson J, Smith E, Chen Y, Mueller JD.** 2013. Brightness analysis.  
731 *Methods Enzymol* **518**:71-98.
- 732 38. **Rissanen I, Stass R, Zeltina A, Li S, Hepojoki J, Harlos K, Gilbert RJC,**  
733 **Huiskonen JT, Bowden TA.** 2017. Structural Transitions of the Conserved and  
734 Metastable Hantaviral Glycoprotein Envelope. *J Virol* **91**.

- 735 39. **Willensky S, Bar-Rogovsky H, Bignon EA, Tischler ND, Modis Y, Dessau M.**  
736 2016. Crystal Structure of Glycoprotein C from a Hantavirus in the Post-fusion  
737 Conformation. PLoS Pathog **12**:e1005948.
- 738 40. **Guardado-Calvo P, Rey FA.** 2017. The Envelope Proteins of the Bunyavirales. Adv  
739 Virus Res **98**:83-118.
- 740
